# Supplementary material for: Liquid chromatographic profiling of monosaccharide concentrations in complex cell-culture media and fermentation broths
Source: Royal Society of Chemistry journal article supplement (doi:10.1039/c0ay00516a), 2010-11-25
Supplement: c0ay00516a.pdf [file c0ay00516a.pdf]

**Table ESI S1** Semi-quantitative evaluation of monosaccharide levels in yeastolates, basal media samples. (Relative peak areas w.r.t GlcN internal standard)

|                                   | Relative peak area |          |          |          |          |             |
|-----------------------------------|--------------------|----------|----------|----------|----------|-------------|
|                                   | Gal                | Man      | Glc      | Xyl      | Fuc      | Sialic acid |
| <b><u>Yeastolate</u></b>          |                    |          |          |          |          |             |
| Sample 1                          | ---                | 2.98     | 7.73     | 0.05     | 0.11     | ---         |
| Sample 2                          | ---                | 2.53     | 8.13     | 0.04     | 0.08     | ---         |
| Sample 3                          | ---                | 2.71     | 7.71     | 0.04     | 0.10     | ---         |
| Sample 4                          | ---                | 2.22     | 5.55     | 0.02     | 0.10     | ---         |
| Sample 5                          | ---                | 2.21     | 5.41     | 0.02     | 0.10     | ---         |
| Sample 6                          | ---                | 2.80     | 7.34     | 0.05     | 0.11     | ---         |
| Sample 7                          | ---                | 3.32     | 8.29     | 0.06     | 0.12     | ---         |
| S.D.                              | ---                | 0.4      | 1.2      | 0.01     | 0.01     | ---         |
| (R.S.D.%)                         | ---                | (15.0 %) | (16.7 %) | (36.8 %) | (10.2 %) | ---         |
| <b><u>Basal media (Lot A)</u></b> |                    |          |          |          |          |             |
| Sample A1                         | ---                | 0.01     | 1.28     | ---      | ---      | 0.13        |
| Sample A2                         | ---                | 0.02     | 1.33     | ---      | ---      | 0.03        |
| Sample A3                         | ---                | 0.01     | 1.11     | ---      | ---      | 0.04        |
| Sample A4                         | ---                | 0.01     | 1.07     | ---      | ---      | 0.07        |
| Sample A5                         | ---                | 0.02     | 1.21     | ---      | ---      | 0.03        |
| Sample A6                         | ---                | 0.01     | 1.17     | ---      | ---      | 0.03        |
| Sample A7                         | ---                | 0.02     | 1.38     | ---      | ---      | 0.30        |
| S.D.                              | ---                | 0.0015   | 0.116    | ---      | ---      | 0.10        |
| (R.S.D.%)                         | ---                | (10.7 %) | (9.5 %)  | ---      | ---      | (112.0 %)   |
| <b><u>Basal media (Lot B)</u></b> |                    |          |          |          |          |             |
| Sample B1                         | 4.8                | ---      | 10.2     | ---      | ---      | 0.18        |
| Sample B2                         | ---                | 0.03     | 3.69     | ---      | ---      | 0.11        |
| Sample B3                         | ---                | 0.04     | 2.56     | ---      | ---      | 0.05        |
| Sample B4                         | ---                | 0.04     | 2.84     | ---      | ---      | 0.08        |
| Sample B5                         | ---                | 0.04     | 3.97     | ---      | ---      | 0.08        |
| Sample B6                         | ---                | 0.03     | 1.99     | ---      | ---      | 0.03        |
| Sample B7                         | ---                | 0.04     | 3.50     | ---      | ---      | 0.20        |
| S.D.                              | ---                | 0.0046   | 2.77     | ---      | ---      | 0.07        |
| (R.S.D.%)                         | ---                | (12.8 %) | (67.5 %) | ---      | ---      | (64.7 %)    |

**Table ESI S2** Semi-quantitative evaluation of monosaccharide levels in in-process samples.  
(Relative peak areas w.r.t GlcN internal standard)

|                                   | <b>Gal</b> | <b>Man</b> | <b>Glc</b> |
|-----------------------------------|------------|------------|------------|
| <b>In-process samples (Lot A)</b> |            |            |            |
| Sample A1                         | N.D.       | 0.020      | 153.2      |
| Sample A2                         | N.D.       | 0.018      | 170.5      |
| Sample A3                         | N.D.       | 0.031      | 111.4      |
| Sample A4                         | N.D.       | 0.015      | 137.6      |
| Sample A5                         | N.D.       | 0.044      | 151.5      |
| Sample A6                         | N.D.       | 0.015      | 159.8      |
| Sample A7                         | N.D.       | 0.034      | 144.8      |
| Sample A8                         | 250.5      | N.D.       | 706        |
| Sample A9                         | 0.025      | 0.020      | 149.8      |
| Sample A10                        | 0.008      | 0.024      | 130.4      |
| Sample A11                        | 154.8      | N.D.       | 457        |
| Sample A12                        | 1.96       | 0.058      | 131.5      |
| Sample A13                        | 262        | N.D.       | 751        |
| Sample A14                        | 17.1       | 0.41       | 17.6       |
| Sample A15                        | 16.9       | 0.43       | 15.1       |
| Sample A16                        | 287.3      | N.D.       | 812.8      |
| <b>In-process samples (Lot B)</b> |            |            |            |
| Sample B1                         | N.D.       | 0.016      | 148.3      |
| Sample B2                         | N.D.       | 0.014      | 117.6      |
| Sample B3                         | N.D.       | 0.043      | 89.7       |
| Sample B4                         | N.D.       | 0.017      | 104.6      |
| Sample B5                         | N.D.       | 0.044      | 76.9       |
| Sample B6                         | N.D.       | 0.015      | 132.5      |
| Sample B7                         | N.D.       | 0.039      | 81.8       |
| Sample B8                         | 286        | N.D.       | 817.3      |
| Sample B9                         | N.D.       | 0.014      | 133.3      |
| Sample B10                        | N.D.       | 0.031      | 103.3      |
| Sample B11                        | 237.6      | N.D.       | 677        |
| Sample B12                        | 2.25       | 0.091      | 14.1       |
| Sample B13                        | 190.8      | N.D.       | 544.8      |
| Sample B14                        | 6.92       | 0.081      | 9.2        |
| Sample B15                        | 7.78       | 0.094      | 5.8        |
| Sample B16                        | 193.5      | N.D.       | 555        |

N.D.: not detected
